# Supplementary material
Source: ML conference proceedings conference paper supplement (https://www.ecva.net/papers/eccv_2022/papers_ECCV/html/136870351_ECCV_2022_paper.php)
Supplement: Supplementary file 3 [file 136870351-supp.zip]

Archive with 4 entries (4 files):
- 2154-supp.pdf
- __MACOSX/._2154-supp.pdf
- ECCV2022_2154_video_2.mp4
- __MACOSX/._ECCV2022_2154_video_2.mp4
